# Supplementary material for: Protein Intake and Functional Integrity in Aging: The Framingham Heart Study Offspring
Source: PubMed Central journal article supplement — J Gerontol A Biol Sci Med Sci. 2018 Sep 24;75(1):123–30. doi: 10.1093/gerona/gly201 (PMC6909900; doi:10.1093/gerona/gly201), 2018-09-24
Supplement: gly201_suppl_supplementary_material.pdf [file gly201_suppl_supplementary_material.pdf]

## **Supplementary Tables**

“Protein intake and functional integrity in aging: The Framingham Heart Study Offspring.”

Authors: Adela Hruby, PhD, MPH, Shivani Sahni, PhD, Douglas Bolster, PhD, Paul F. Jacques, DSc

**Supplementary Table 1.** Components of the Functional Integrity Score.

**Supplementary Table 2.** Components of the Functional Integrity Score and relationships with the total score.

**Supplementary Table 3.** Odds ratios of reporting a fall or a fracture in the year leading up to the exam, based on the Functional Integrity Score in participants of the Framingham Offspring.

**Supplementary Table 4.** Odds ratios of being frail at the respective exam, based on the Functional Integrity Score at exams 8 and 9 in participants of the Framingham Offspring.

**Supplementary Table 5.** Adjusted least square means of objective functional measures  $\leq$  and  $>15$ th percentile of the Functional Integrity Score at exams 8 and 9 in participants of the Framingham Offspring.

**Supplementary Table 6.** Sensitivity analyses using alternate cut-points of the Functional Integrity Score to estimate hazard ratios (95% confidence intervals) of incident loss of functional integrity by quartile category of average protein intake in participants of the Framingham Offspring.

**Supplementary Table 7.** Secondary analyses using various cut-points of the Functional Integrity Score to estimate hazard ratios (95% confidence intervals) of incident loss of functional integrity by quartile category of average protein intake, expressed in grams per kilogram body weight per day, in participants of the Framingham Offspring.

**Supplementary Table 8.** Sex-specific secondary analyses of the Functional Integrity Score to estimate hazard ratios (95% confidence intervals) of incident loss of functional integrity by quartile category of average protein intake, expressed in grams per kilogram body weight per day, in male and female participants of the Framingham Offspring.

**Supplementary Table 1.** Components of the Functional Integrity Score.

| Scale                           | Short Name                     | Question Example*                                                                                                                                                                                                                                   | Response Scores**                                                                                                                      |
|---------------------------------|--------------------------------|-----------------------------------------------------------------------------------------------------------------------------------------------------------------------------------------------------------------------------------------------------|----------------------------------------------------------------------------------------------------------------------------------------|
| Katz Activities of Daily Living | ADL Dressing                   | During the course of a normal day, can you get dressed (undressing redressing) independently or do you need human assistance or the use of a device (such as velcro, elastic laces)?                                                                | 0 = no help needed, independent<br>1 = uses device, independent<br>2 = human assistance needed, minimally dependent<br>3 = dependent   |
| Katz Activities of Daily Living | ADL Bathing                    | During the course of a normal day, can you bathe (including getting in and out of the tub or shower) independently or do you need human assistance or the use of a device (such as bath chair, long handled sponge, hand held shower, safety bars)? | Same as above.                                                                                                                         |
| Katz Activities of Daily Living | ADL Eating                     | During the course of a normal day, can you eat independently or do you need human assistance or the use of a device (such as rocking knife, spork, long straw, plate guard)?                                                                        | Same as above.                                                                                                                         |
| Katz Activities of Daily Living | ADL Transferring               | During the course of a normal day, can you transfer (getting in and out of a chair) independently or do you need human assistance or the use of a device (such as, sliding board, grab bars, special seat)?                                         | Same as above.                                                                                                                         |
| Katz Activities of Daily Living | ADL Toileting                  | During the course of a normal day, can you do toileting activities (using bathroom facilities and handle clothing) independently or do you need human assistance or the use of a device (such as, special toilet seat, commode)?                    | Same as above.                                                                                                                         |
| Rosow-Breslau                   | Rosow-Breslau Housework        | Are you able to do heavy work around the house, like shoveling snow or washing windows, walls, or floors without help?                                                                                                                              | 0 = no<br>1 = yes                                                                                                                      |
| Rosow-Breslau                   | Rosow-Breslau Flight of Stairs | Are you able to walk up and down one flight of stairs without help?                                                                                                                                                                                 | Same as above.                                                                                                                         |
| Rosow-Breslau***                | Rosow-Breslau Walk 1/2 Mile    | Are you able to walk half a mile without help? (about 4-6 blocks)                                                                                                                                                                                   | Same as above.                                                                                                                         |
| Nagi                            | Nagi Pulling                   | Difficulty with... Pulling or pushing large objects like a living room chair                                                                                                                                                                        | 0 = no difficulty<br>1 = a little difficulty<br>2 = some difficulty<br>3 = a lot of difficulty / unable to do or don't do on MD orders |
| Nagi                            | Nagi Stooping                  | Difficulty with... Either stooping, crouching, or kneeling                                                                                                                                                                                          | Same as above.                                                                                                                         |
| Nagi                            | Nagi Low Arms                  | Difficulty with... Reaching or extending arms below shoulder level                                                                                                                                                                                  | Same as above.                                                                                                                         |
| Nagi                            | Nagi High Arms                 | Difficulty with... Reaching or extending arms above shoulder level                                                                                                                                                                                  | Same as above.                                                                                                                         |
| Nagi                            | Nagi Writing                   | Difficulty with... Either writing, or handling, or fingering small objects                                                                                                                                                                          | Same as above.                                                                                                                         |
| Nagi                            | Nagi Standing                  | Difficulty with... Standing in one place for long periods, say 15 minutes                                                                                                                                                                           | Same as above.                                                                                                                         |
| Nagi                            | Nagi Sitting                   | Difficulty with... Sitting for long periods, say 1 hour                                                                                                                                                                                             | Same as above.                                                                                                                         |
| Nagi                            | Nagi Light Weights             | Difficulty with... Lifting or carrying weights under 10 pounds (like a bag of potatoes)                                                                                                                                                             | Same as above.                                                                                                                         |
| Nagi                            | Nagi Heavy Weights             | Difficulty with... Lifting or carrying weights over 10 pounds (like a very heavy bag of groceries)                                                                                                                                                  | Same as above.                                                                                                                         |

\*Questions varied insignificantly between exams.

\*\*Responses were subsequently scaled to a 10-point range wherein independence/highest ability/no difficulty was rated 10.

\*\*\*This measure was not available at exam 7; however, an ADL flight-of-stairs measure was available and substituted for the Rosow-Breslau measure at exam 7 only.

**Supplementary Table 2.** Components of the Functional Integrity Score and relationships with the total score.

| Score Component                | Exam 5                     |                   | Exam 6                     |                   | Exam 7                     |                   | Exam 8                     |                   | Exam 9                     |                   |
|--------------------------------|----------------------------|-------------------|----------------------------|-------------------|----------------------------|-------------------|----------------------------|-------------------|----------------------------|-------------------|
|                                | Correlation with total FIS | Cronbach's alpha* |
| ADL Dressing                   | 0.12                       | 0.82              | 0.37                       | 0.83              | 0.13                       | 0.80              | 0.35                       | 0.83              | 0.41                       | 0.86              |
| ADL Bathing                    | 0.31                       | 0.81              | 0.45                       | 0.83              | 0.40                       | 0.79              | 0.51                       | 0.83              | 0.54                       | 0.85              |
| ADL Eating                     | 0.17                       | 0.82              | 0.29                       | 0.83              | 0.10                       | 0.80              | 0.29                       | 0.83              | 0.20                       | 0.86              |
| ADL Transferring               | 0.38                       | 0.81              | 0.45                       | 0.83              | 0.36                       | 0.80              | 0.42                       | 0.83              | 0.44                       | 0.86              |
| ADL Toileting                  | 0.25                       | 0.81              | 0.35                       | 0.83              | 0.27                       | 0.80              | 0.40                       | 0.83              | 0.48                       | 0.86              |
| Rosow-Breslau Housework        | 0.60                       | 0.80              | 0.55                       | 0.82              | 0.53                       | 0.78              | <b>0.61</b>                | 0.82              | <b>0.66</b>                | 0.85              |
| Rosow-Breslau Flight of Stairs | 0.43                       | 0.80              | 0.40                       | 0.82              | 0.48                       | 0.79              | 0.43                       | 0.83              | 0.57                       | 0.85              |
| Rosow-Breslau Walk 1/2 Mile    | 0.48                       | 0.80              | 0.49                       | 0.82              | 0.43                       | 0.78              | 0.57                       | 0.82              | <b>0.67</b>                | 0.84              |
| Nagi Pulling                   | <b>0.64</b>                | 0.78              | <b>0.62</b>                | 0.81              | 0.60                       | 0.77              | 0.59                       | 0.81              | <b>0.64</b>                | 0.85              |
| Nagi Stooping                  | 0.53                       | 0.80              | 0.51                       | 0.82              | 0.55                       | 0.77              | 0.48                       | 0.82              | 0.58                       | 0.85              |
| Nagi Low Arms                  | 0.19                       | 0.81              | 0.28                       | 0.83              | 0.30                       | 0.79              | 0.46                       | 0.83              | 0.42                       | 0.86              |
| Nagi High Arms                 | 0.32                       | 0.81              | 0.39                       | 0.82              | 0.28                       | 0.79              | 0.37                       | 0.83              | 0.38                       | 0.86              |
| Nagi Writing                   | 0.30                       | 0.81              | 0.37                       | 0.82              | 0.34                       | 0.79              | 0.30                       | 0.83              | 0.39                       | 0.86              |
| Nagi Standing                  | 0.59                       | 0.79              | <b>0.60</b>                | 0.81              | 0.55                       | 0.77              | 0.57                       | 0.82              | <b>0.61</b>                | 0.85              |
| Nagi Sitting                   | 0.44                       | 0.80              | 0.40                       | 0.82              | 0.33                       | 0.79              | 0.29                       | 0.83              | 0.28                       | 0.86              |
| Nagi Light Weights             | 0.56                       | 0.80              | <b>0.64</b>                | 0.81              | 0.58                       | 0.78              | <b>0.61</b>                | 0.82              | 0.59                       | 0.85              |
| Nagi Heavy Weights             | <b>0.68</b>                | 0.78              | <b>0.70</b>                | 0.80              | <b>0.65</b>                | 0.77              | <b>0.62</b>                | 0.81              | <b>0.69</b>                | 0.84              |

Abbreviation: FIS, Functional Integrity Score.

\*Cronbach's alpha is a measure of reliability, or internal consistency of a set of scale or test items (i.e., how closely related a set of items are as a group).

For ease of reading, items highlighted in bold are correlations  $\geq 0.60$  with the total Functional Integrity Score.

**Supplementary Table 3.** Odds ratios of reporting a fall or a fracture in the year leading up to the exam, based on the Functional Integrity Score.

|                  | Events/Non-Events | Exposure             | Odds Ratio (95% CI) of Having Fallen/<br>Suffered a Fracture in Prior Year* |                      |
|------------------|-------------------|----------------------|-----------------------------------------------------------------------------|----------------------|
| <b>Falls</b>     |                   |                      |                                                                             |                      |
| Exam 5**         | 524/2386          | Per 1 point in FIS   | 0.94 (0.90, 0.98)                                                           |                      |
| Exam 6           | 475/2161          | Per 1 point in FIS   | 0.97 (0.95, 0.99)                                                           |                      |
|                  | 498/2219          | FIS >10th percentile | 0.64 (0.44, 0.93)                                                           | vs. ≤10th percentile |
|                  | 475/2161          | FIS >15th percentile | 0.65 (0.47, 0.90)                                                           | vs. ≤15th percentile |
|                  | 457/2086          | FIS >20th percentile | 0.67 (0.50, 0.89)                                                           | vs. ≤20th percentile |
| Exam 7           | 460/2086          | Per 1 point in FIS   | 0.95 (0.94, 0.97)                                                           |                      |
|                  | 486/2139          | FIS >10th percentile | 0.51 (0.37, 0.73)                                                           | vs. ≤10th percentile |
|                  | 460/2086          | FIS >15th percentile | 0.53 (0.39, 0.72)                                                           | vs. ≤15th percentile |
|                  | 445/2009          | FIS >20th percentile | 0.48 (0.36, 0.63)                                                           | vs. ≤20th percentile |
| <b>Fractures</b> |                   |                      |                                                                             |                      |
| Exam 5**         | 159/2750          | Per 1 point in FIS   | 0.97 (0.91, 1.05)                                                           |                      |
| Exam 6           | 177/2458          | Per 1 point in FIS   | 0.97 (0.95, 0.99)                                                           |                      |
|                  | 186/2530          | FIS >10th percentile | 0.62 (0.36, 1.05)                                                           | vs. ≤10th percentile |
|                  | 177/2458          | FIS >15th percentile | 0.78 (0.47, 1.29)                                                           | vs. ≤15th percentile |
|                  | 168/2374          | FIS >20th percentile | 0.82 (0.52, 1.31)                                                           | vs. ≤20th percentile |
| Exam 7           | 154/2400          | Per 1 point in FIS   | 0.97 (0.95, 0.99)                                                           |                      |
|                  | 158/2472          | FIS >10th percentile | 0.56 (0.33, 0.94)                                                           | vs. ≤10th percentile |
|                  | 154/2400          | FIS >15th percentile | 0.48 (0.31, 0.75)                                                           | vs. ≤15th percentile |
|                  | 150/2312          | FIS >20th percentile | 0.49 (0.32, 0.74)                                                           | vs. ≤20th percentile |
| Exam 8           | 241/1964          | Per 1 point in FIS   | 0.97 (0.96, 0.98)                                                           |                      |
|                  | 247/2024          | FIS >10th percentile | 0.54 (0.37, 0.78)                                                           | vs. ≤10th percentile |
|                  | 241/1964          | FIS >15th percentile | 0.53 (0.38, 0.73)                                                           | vs. ≤15th percentile |
|                  | 234/1902          | FIS >20th percentile | 0.70 (0.51, 0.97)                                                           | vs. ≤20th percentile |
| Exam 9           | 154/1632          | Per 1 point in FIS   | 0.97 (0.95, 0.98)                                                           |                      |
|                  | 158/1680          | FIS >10th percentile | 0.34 (0.22, 0.54)                                                           | vs. ≤10th percentile |
|                  | 154/1632          | FIS >15th percentile | 0.37 (0.25, 0.55)                                                           | vs. ≤15th percentile |
|                  | 151/1578          | FIS >20th percentile | 0.46 (0.31, 0.68)                                                           | vs. ≤20th percentile |

Abbreviation: FIS, Functional Integrity Score.

\*Adjusted for age, sex, and body mass index. Reference level for odds ratios is the category below the percentile indicated (e.g., for FIS >10th percentile, the reference category is ≤10th percentile).

\*\*Odds ratios are not available, because participants in the percentile below the cut point were excluded at baseline.

**Supplementary Table 4.** Odds ratios of being frail at the respective exam, based on the Functional Integrity Score at exams 8 and 9.

| Frailty | Events/Non-Events | Exposure             | Odds Ratio (95% CI) of Being Frail* |                      |
|---------|-------------------|----------------------|-------------------------------------|----------------------|
| Exam 8  | 119/2102          | Per 1 point in FIS   | 0.93 (0.92, 0.95)                   |                      |
|         | 125/2162          | FIS >10th percentile | 0.14 (0.09, 0.22)                   | vs. ≤10th percentile |
|         | 119/2102          | FIS >15th percentile | 0.14 (0.09, 0.22)                   | vs. ≤15th percentile |
|         | 116/2036          | FIS >20th percentile | 0.17 (0.11, 0.26)                   | vs. ≤20th percentile |
| Exam 9  | 124/1675          | Per 1 point in FIS   | 0.93 (0.92, 0.95)                   |                      |
|         | 130/1721          | FIS >10th percentile | 0.12 (0.07, 0.18)                   | vs. ≤10th percentile |
|         | 124/1675          | FIS >15th percentile | 0.14 (0.09, 0.22)                   | vs. ≤15th percentile |
|         | 115/1627          | FIS >20th percentile | 0.18 (0.12, 0.28)                   | vs. ≤20th percentile |

Abbreviation: FIS, Functional Integrity Score.

\*Frailty definition adapted from Fried LP, Tangen CM, Walston J, *et al.* Frailty in older adults: evidence for a phenotype. *J Gerontol A Biol Sci Med Sci.* 2001; 56(3): M146-156. Odds ratios were adjusted for age, sex, body mass index, and height. Reference level for odds ratios is the category below the percentile indicated (e.g., for FIS >10th percentile, the reference category is ≤10th percentile).

**Supplementary Table 5.** Adjusted least square means of objective functional measures  $\leq$  and  $>$ 15th percentile of the Functional Integrity Score at exams 8 and 9.\*

| Objective Functional Measure  | Mean (SD)<br>at FIS Exam 8 |               |                | Mean (SD)<br>at FIS Exam 9 |               |                |
|-------------------------------|----------------------------|---------------|----------------|----------------------------|---------------|----------------|
|                               | $\leq$ 10th %ile           | $>$ 10th %ile | <i>P</i> diff. | $\leq$ 10th %ile           | $>$ 10th %ile | <i>P</i> diff. |
| Gait speed, m/s               | 1.08 (0.01)                | 1.19 (0.01)   | $<$ 0.001      | 0.91 (0.02)                | 1.10 (0.004)  | $<$ 0.001      |
| Quick gait speed, m/s         | 1.47 (0.02)                | 1.63 (0.01)   | $<$ 0.001      | 1.24 (0.02)                | 1.48 (0.01)   | $<$ 0.001      |
| Grip strength, left hand, kg  | 25.39 (0.45)               | 27.38 (0.16)  | $<$ 0.001      | 22.33 (0.58)               | 26.58 (0.16)  | $<$ 0.001      |
| Grip strength, right hand, kg | 26.93 (0.44)               | 29.44 (0.16)  | $<$ 0.001      | 22.68 (0.59)               | 26.84 (0.16)  | $<$ 0.001      |
|                               | $\leq$ 15th %ile           | $>$ 15th %ile | <i>P</i> diff. | $\leq$ 15th %ile           | $>$ 15th %ile | <i>P</i> diff. |
| Gait speed, m/s               | 1.11 (0.01)                | 1.19 (0.01)   | $<$ 0.001      | 0.98 (0.01)                | 1.10 (0.004)  | $<$ 0.001      |
| Quick gait speed, m/s         | 1.51 (0.02)                | 1.64 (0.01)   | $<$ 0.001      | 1.32 (0.02)                | 1.49 (0.01)   | $<$ 0.001      |
| Grip strength, left hand, kg  | 25.59 (0.38)               | 27.94 (0.16)  | $<$ 0.001      | 23.32 (0.45)               | 26.89 (0.16)  | $<$ 0.001      |
| Grip strength, right hand, kg | 27.41 (0.38)               | 29.65 (0.16)  | $<$ 0.001      | 23.83 (0.46)               | 27.08 (0.17)  | $<$ 0.001      |
|                               | $\leq$ 20th %ile           | $>$ 20th %ile | <i>P</i> diff. | $\leq$ 20th %ile           | $>$ 20th %ile | <i>P</i> diff. |
| Gait speed, m/s               | 1.11 (0.01)                | 1.20 (0.01)   | $<$ 0.001      | 0.99 (0.01)                | 1.11 (0.004)  | $<$ 0.001      |
| Quick gait speed, m/s         | 1.53 (0.02)                | 1.65 (0.01)   | $<$ 0.001      | 1.34 (0.01)                | 1.50 (0.01)   | $<$ 0.001      |
| Grip strength, left hand, kg  | 25.92 (0.35)               | 28.11 (0.17)  | $<$ 0.001      | 23.97 (0.40)               | 27.03 (0.17)  | $<$ 0.001      |
| Grip strength, right hand, kg | 27.81 (0.35)               | 29.78 (0.17)  | $<$ 0.001      | 24.30 (0.41)               | 27.23 (0.17)  | $<$ 0.001      |

Abbreviations: %ile, percentile; diff., difference; FIS, Functional Integrity Score.

\*Least square means in categories of the Functional Integrity Score were adjusted for age, sex, BMI, and height (for gait speeds).

**Supplementary Table 6.** Sensitivity analyses using alternate cut-points of the Functional Integrity Score to estimate hazard ratios (95% confidence intervals) of incident loss of functional integrity by quartile category of average protein intake in participants of the Framingham Offspring.

|                                      | Hazard Ratio (95%CI) of Incident Loss of Functional Integrity<br>Per Quartile Category of Average Protein Intake<br>(median, g/d) |                   |                   |                   | <b>P trend</b> |
|--------------------------------------|-----------------------------------------------------------------------------------------------------------------------------------|-------------------|-------------------|-------------------|----------------|
|                                      | 64.5                                                                                                                              | 74.5              | 82.0              | 92.1              |                |
| <b>Outcome: FIS ≤10th percentile</b> |                                                                                                                                   |                   |                   |                   |                |
| Events, <i>N</i>                     | 151                                                                                                                               | 123               | 135               | 124               |                |
| Person-years                         | 10375                                                                                                                             | 11415             | 11799             | 11274             |                |
| Crude rate per 100 p-y               | 1.46                                                                                                                              | 1.08              | 1.14              | 1.10              |                |
| Model 1                              | 1 ( <i>ref</i> )                                                                                                                  | 0.67 (0.53, 0.86) | 0.69 (0.54, 0.88) | 0.65 (0.51, 0.83) | 0.001          |
| Model 2                              | 1 ( <i>ref</i> )                                                                                                                  | 0.72 (0.53, 0.98) | 0.65 (0.48, 0.88) | 0.52 (0.37, 0.72) | <0.001         |
| Model 3                              | 1 ( <i>ref</i> )                                                                                                                  | 0.74 (0.55, 1.01) | 0.71 (0.52, 0.97) | 0.59 (0.42, 0.84) | 0.003          |
| Model 4                              | 1 ( <i>ref</i> )                                                                                                                  | 0.79 (0.58, 1.08) | 0.82 (0.59, 1.13) | 0.60 (0.42, 0.86) | 0.008          |
| Model 5                              | 1 ( <i>ref</i> )                                                                                                                  | 0.80 (0.58, 1.09) | 0.82 (0.60, 1.14) | 0.61 (0.43, 0.86) | 0.009          |
| <b>Outcome: FIS ≤20th percentile</b> |                                                                                                                                   |                   |                   |                   |                |
| Events, <i>N</i>                     | 229                                                                                                                               | 216               | 224               | 211               |                |
| Person-years                         | 8963                                                                                                                              | 10095             | 10176             | 9873              |                |
| Crude rate per 100 p-y               | 2.56                                                                                                                              | 2.14              | 2.20              | 2.14              |                |
| Model 1                              | 1 ( <i>ref</i> )                                                                                                                  | 0.80 (0.66, 0.96) | 0.76 (0.63, 0.92) | 0.72 (0.59, 0.88) | 0.001          |
| Model 2                              | 1 ( <i>ref</i> )                                                                                                                  | 0.95 (0.74, 1.22) | 0.85 (0.66, 1.09) | 0.68 (0.52, 0.89) | 0.003          |
| Model 3                              | 1 ( <i>ref</i> )                                                                                                                  | 1.00 (0.78, 1.29) | 0.95 (0.73, 1.24) | 0.80 (0.60, 1.06) | 0.11           |
| Model 4                              | 1 ( <i>ref</i> )                                                                                                                  | 1.00 (0.78, 1.29) | 1.01 (0.78, 1.32) | 0.78 (0.59, 1.04) | 0.10           |
| Model 5                              | 1 ( <i>ref</i> )                                                                                                                  | 1.02 (0.79, 1.32) | 1.02 (0.78, 1.33) | 0.78 (0.59, 1.04) | 0.10           |

Abbreviation: FIS, Functional Integrity Score; p-y, person-years.

Models were adjusted as follows: model 1 was adjusted for baseline age, sex, cumulative average energy intake, and the baseline Functional Integrity Score. Model 2 (risk factor model) was adjusted as for model 1, plus baseline and updated variables of body mass index, waist circumference, systolic blood pressure, treatment for hypertension, total:high-density lipoprotein cholesterol, treatment for hyperlipidemia, smoking status, and physical activity. Model 3 (diet model) was further adjusted for cumulative average intake of saturated fat, monounsaturated fat, polyunsaturated fat, and the Glycemic Index of the overall diet. Model 4 (socioeconomic risk model) was adjusted as for model 3, plus highest education completed and the most recent self-rated health status. Model 5 further adjusted for a cardiovascular event prior to the outcome. All models were stratified by 5-y age groups. *P* values for trend across quartile categories of intake were estimated using the median value in each quartile category, modeled as a continuous variable.

**Supplementary Table 7.** Secondary analyses using various cut-points of the Functional Integrity Score to estimate hazard ratios (95% confidence intervals) of incident loss of functional integrity by quartile category of average protein intake, expressed in grams per kilogram body weight per day, in participants of the Framingham Offspring.

|                                         | Hazard Ratio (95%CI) of Incident Loss of Functional Integrity<br>Per Quartile Category of Average Protein Intake<br>(median, g/kg body weight /d) |                   |                   |                   |                |
|-----------------------------------------|---------------------------------------------------------------------------------------------------------------------------------------------------|-------------------|-------------------|-------------------|----------------|
| <b>Outcome is FIS ≤10th percentile</b>  | 0.74                                                                                                                                              | 0.93              | 1.11              | 1.37              | <b>P trend</b> |
| Events, <i>N</i>                        | 150                                                                                                                                               | 123               | 145               | 115               |                |
| Person-years                            | 10582                                                                                                                                             | 11447             | 11050             | 11783             |                |
| Crude rate per 100 p-y                  | 1.42                                                                                                                                              | 1.07              | 1.31              | 0.98              |                |
| Model 1                                 | 1 ( <i>ref</i> )                                                                                                                                  | 0.69 (0.54, 0.88) | 0.63 (0.49, 0.81) | 0.40 (0.31, 0.53) | <0.001         |
| Model 2                                 | 1 ( <i>ref</i> )                                                                                                                                  | 0.75 (0.54, 1.02) | 0.73 (0.50, 1.07) | 0.53 (0.33, 0.85) | 0.01           |
| Model 3                                 | 1 ( <i>ref</i> )                                                                                                                                  | 0.81 (0.59, 1.12) | 0.89 (0.60, 1.32) | 0.67 (0.41, 1.09) | 0.14           |
| Model 4                                 | 1 ( <i>ref</i> )                                                                                                                                  | 0.85 (0.61, 1.17) | 0.91 (0.61, 1.35) | 0.70 (0.42, 1.14) | 0.18           |
| Model 5                                 | 1 ( <i>ref</i> )                                                                                                                                  | 0.85 (0.61, 1.18) | 0.91 (0.61, 1.35) | 0.70 (0.43, 1.15) | 0.19           |
| <b>Outcome is FIS ≤15th percentile*</b> | 0.75                                                                                                                                              | 0.93              | 1.11              | 1.37              | <b>P trend</b> |
| Events, <i>N</i>                        | 208                                                                                                                                               | 176               | 199               | 148               |                |
| Person-years                            | 9802                                                                                                                                              | 10794             | 10163             | 11212             |                |
| Crude rate per 100 p-y                  | 2.12                                                                                                                                              | 1.63              | 1.96              | 1.32              |                |
| Model 1                                 | 1 ( <i>ref</i> )                                                                                                                                  | 0.70 (0.57, 0.86) | 0.64 (0.52, 0.80) | 0.36 (0.28, 0.46) | <0.001         |
| Model 2                                 | 1 ( <i>ref</i> )                                                                                                                                  | 0.82 (0.62, 1.07) | 0.78 (0.57, 1.08) | 0.49 (0.33, 0.73) | <0.001         |
| Model 3                                 | 1 ( <i>ref</i> )                                                                                                                                  | 0.90 (0.69, 1.19) | 0.98 (0.70, 1.36) | 0.64 (0.43, 0.98) | 0.04           |
| Model 4                                 | 1 ( <i>ref</i> )                                                                                                                                  | 0.95 (0.72, 1.25) | 1.00 (0.72, 1.40) | 0.66 (0.43, 1.01) | 0.06           |
| Model 5                                 | 1 ( <i>ref</i> )                                                                                                                                  | 0.95 (0.72, 1.26) | 1.01 (0.73, 1.42) | 0.67 (0.44, 1.02) | 0.07           |
| <b>Outcome is FIS ≤20th percentile</b>  | 0.75                                                                                                                                              | 0.93              | 1.11              | 1.37              | <b>P trend</b> |
| Events, <i>N</i>                        | 256                                                                                                                                               | 190               | 239               | 195               |                |
| Person-years                            | 9097                                                                                                                                              | 10198             | 9455              | 10357             |                |
| Crude rate per 100 p-y                  | 2.81                                                                                                                                              | 1.86              | 2.53              | 1.88              |                |
| Model 1                                 | 1 ( <i>ref</i> )                                                                                                                                  | 0.61 (0.50, 0.74) | 0.63 (0.52, 0.77) | 0.41 (0.33, 0.51) | <0.001         |
| Model 2                                 | 1 ( <i>ref</i> )                                                                                                                                  | 0.69 (0.54, 0.89) | 0.77 (0.58, 1.04) | 0.55 (0.38, 0.80) | 0.004          |
| Model 3                                 | 1 ( <i>ref</i> )                                                                                                                                  | 0.75 (0.58, 0.97) | 0.92 (0.68, 1.26) | 0.69 (0.47, 1.01) | 0.10           |
| Model 4                                 | 1 ( <i>ref</i> )                                                                                                                                  | 0.77 (0.60, 1.01) | 0.92 (0.68, 1.26) | 0.69 (0.47, 1.02) | 0.12           |
| Model 5                                 | 1 ( <i>ref</i> )                                                                                                                                  | 0.77 (0.59, 1.01) | 0.93 (0.68, 1.26) | 0.70 (0.47, 1.03) | 0.12           |

Abbreviation: FIS, Functional Integrity Score; p-y, person-years.

\*This cut-point represents the primary outcome in primary analyses.

Models were adjusted as in the analyses for protein expressed in grams per day, except that updated body mass index was replaced with weight change owing to confounding by body mass index because of units (i.e., kg in the numerator of body mass index), as follows: model 1 was adjusted for baseline age, sex, cumulative average energy intake, and the baseline functional integrity score. Model 2 (risk factor model) was adjusted as for model 1, plus baseline body mass index, waist circumference, systolic blood pressure, treatment for hypertension, total:high-density lipoprotein cholesterol, treatment for hyperlipidemia, smoking status, weight change, and physical activity. Model 3 (diet model) was further adjusted for cumulative average intake of saturated fat, monounsaturated fat, polyunsaturated fat, and the Glycemic Index of the overall diet. Model 4 (socioeconomic risk model) was adjusted as for model 3, plus highest education completed and the most recent self-rated health status. Model 5 further adjusted for a cardiovascular event prior to the outcome. All models were stratified by 5-y age groups. *P* values for trend across quartile categories of intake were estimated using the median value in each quartile category, modeled as a continuous variable.



**Supplementary Table 8.** Sex-specific secondary analyses of the Functional Integrity Score to estimate hazard ratios (95% confidence intervals) of incident loss of functional integrity ( $\leq 15$ th percentile of the Functional Integrity Score) by quartile category of average protein intake, expressed in grams per kilogram body weight per day, in male and female participants of the Framingham Offspring.

| Sex                    | Hazard Ratio (95%CI) of Incident Loss of Functional Integrity<br>Per Quartile Category of Average Protein Intake<br>(median, g/kg body weight/d) |                   |                   |                   | P trend |
|------------------------|--------------------------------------------------------------------------------------------------------------------------------------------------|-------------------|-------------------|-------------------|---------|
|                        | 0.75                                                                                                                                             | 0.93              | 1.11              | 1.37              |         |
| <b>Female</b>          |                                                                                                                                                  |                   |                   |                   |         |
| Events, <i>N</i>       | 72                                                                                                                                               | 97                | 146               | 137               |         |
| Person-years           | 1427                                                                                                                                             | 3409              | 6251              | 10020             |         |
| Crude rate per 100 p-y | 5.04                                                                                                                                             | 2.85              | 2.34              | 1.37              |         |
| Model 1                | 1 ( <i>ref</i> )                                                                                                                                 | 0.65 (0.48, 0.89) | 0.53 (0.39, 0.70) | 0.31 (0.23, 0.41) | <0.001  |
| Model 2                | 1 ( <i>ref</i> )                                                                                                                                 | 0.84 (0.53, 1.33) | 0.62 (0.38, 1.00) | 0.39 (0.23, 0.67) | <0.001  |
| Model 3                | 1 ( <i>ref</i> )                                                                                                                                 | 1.02 (0.63, 1.63) | 0.83 (0.50, 1.39) | 0.56 (0.31, 1.01) | 0.007   |
| Model 4                | 1 ( <i>ref</i> )                                                                                                                                 | 1.09 (0.67, 1.76) | 0.89 (0.53, 1.51) | 0.59 (0.32, 1.08) | 0.009   |
| Model 5                | 1 ( <i>ref</i> )                                                                                                                                 | 1.10 (0.68, 1.78) | 0.89 (0.53, 1.51) | 0.60 (0.33, 1.09) | 0.01    |
| <b>Male</b>            |                                                                                                                                                  |                   |                   |                   |         |
| Events, <i>N</i>       | 136                                                                                                                                              | 79                | 53                | 11                |         |
| Person-years           | 8374                                                                                                                                             | 7385              | 3912              | 1192              |         |
| Crude rate per 100 p-y | 1.62                                                                                                                                             | 1.07              | 1.35              | 0.92              |         |
| Model 1                | 1 ( <i>ref</i> )                                                                                                                                 | 0.67 (0.51, 0.89) | 0.82 (0.59, 1.14) | 0.60 (0.32, 1.12) | 0.04    |
| Model 2                | 1 ( <i>ref</i> )                                                                                                                                 | 0.76 (0.53, 1.10) | 1.14 (0.73, 1.78) | 0.83 (0.37, 1.88) | 0.92    |
| Model 3                | 1 ( <i>ref</i> )                                                                                                                                 | 0.80 (0.55, 1.16) | 1.37 (0.85, 2.19) | 0.88 (0.38, 2.01) | 0.72    |
| Model 4                | 1 ( <i>ref</i> )                                                                                                                                 | 0.80 (0.55, 1.16) | 1.30 (0.80, 2.12) | 1.00 (0.43, 2.31) | 0.64    |
| Model 5                | 1 ( <i>ref</i> )                                                                                                                                 | 0.78 (0.54, 1.14) | 1.34 (0.83, 2.17) | 0.95 (0.41, 2.20) | 0.65    |

Abbreviation: p-y, person-years.

*P* interaction between protein and sex <0.05. Models were adjusted as in the analyses for protein expressed in grams per day, except that updated body mass index was replaced with weight change owing to confounding by body mass index because of units (i.e., kg in the numerator of body mass index), as follows: model 1 was adjusted for baseline age, cumulative average energy intake, and the baseline functional integrity score. Model 2 (risk factor model) was adjusted as for model 1, plus baseline body mass index, waist circumference, systolic blood pressure, treatment for hypertension, total:high-density lipoprotein cholesterol, treatment for hyperlipidemia, smoking status, weight change, and physical activity. Model 3 (diet model) was further adjusted for cumulative average intake of saturated fat, monounsaturated fat, polyunsaturated fat, and the Glycemic Index of the overall diet. Model 4 (socioeconomic risk model) was adjusted as for model 3, plus highest education completed and the most recent self-rated health status. Model 5 further adjusted for a cardiovascular event prior to the outcome. All models were stratified by 5-y age groups. *P* values for trend across quartile categories of intake were estimated using the median value in each quartile category, modeled as a continuous variable.
